# Supplementary material for: Syntheses, structures and fluorescence of two coordination complexes of Zn(ii) and 1,3-bis(2-methylimidazolyl)propane: solvent effect
Source: Royal Society of Chemistry journal article supplement (doi:10.1039/c2ce25673h), 2012-01-01

## *Supporting Information for CrystEngComm*

### **Syntheses, Structures and Fluorescences of Two Coordination Complexes of Zn(II) and 1,3-Bis(2-methylimidazolyl)propane: Solvent Effect**

**Hong-Jun Hao, Fu-Jing Liu, Hai-Feng Su, Zhan-Hui Wang, Dan-Feng Wang, Rong-Bin Huang,\* and Lan-Sun Zheng**

*Department of chemistry, College of Chemistry and Chemical Engineering and State key Laboratory for Physical Chemistry of Solid Surfaces, Xiamen University, Xiamen 361005, People's Republic of China*

|                                                                                                                                      |          |
|--------------------------------------------------------------------------------------------------------------------------------------|----------|
| <b>Table S1: The hydrogen bond geometries for 2 .....</b>                                                                            | <b>2</b> |
| <b>Figure S1: The powder XRD patterns and the simulated one from the single-crystal diffraction data for complexes 1 and 2 .....</b> | <b>3</b> |
| <b>Figure S2: The IR spectra of complexes 1 and 2 .....</b>                                                                          | <b>4</b> |
| <b>Figure S3: The 2D layer structure of complex 1 .....</b>                                                                          | <b>5</b> |

---

\*Correspondence e-mail: rbhuang@xmu.edu.cn. Fax: 86-592-2183074

**Table S1: The hydrogen bond geometries for 2**

---

| Complex 2                    |             |               |                       |                         |
|------------------------------|-------------|---------------|-----------------------|-------------------------|
| <i>D</i> —H··· <i>A</i>      | <i>D</i> —H | H··· <i>A</i> | <i>D</i> ··· <i>A</i> | <i>D</i> —H··· <i>A</i> |
| O1W—H1WA···O3W               | 0.84        | 1.92          | 2.754(7)              | 170                     |
| O1W—H1WB···O4 <sup>ii</sup>  | 0.84        | 2.06          | 2.892(6)              | 170                     |
| O2W—H2WA···O2                | 0.78        | 1.95          | 2.717(6)              | 165                     |
| O2W—H2WB···O3 <sup>iii</sup> | 0.87        | 1.90          | 2.760(6)              | 168                     |
| O3W—H3WA···O1W <sup>iv</sup> | 0.85        | 1.95          | 2.775(7)              | 164                     |
| O3W—H3WB···O2W <sup>v</sup>  | 0.85        | 1.86          | 2.686(7)              | 163                     |

Symmetry codes: (ii)  $-x+1, y+1/2, -z+3/2$ ; (iii)  $x-1, y, z$ ; (iv)  $-x+1, -y+1, -z+2$ ; (v)  $x, -y+1/2, z+1/2$ .

**Figure S1: The powder XRD patterns and the simulated one from the single-crystal diffraction data for complexes 1 and 2**

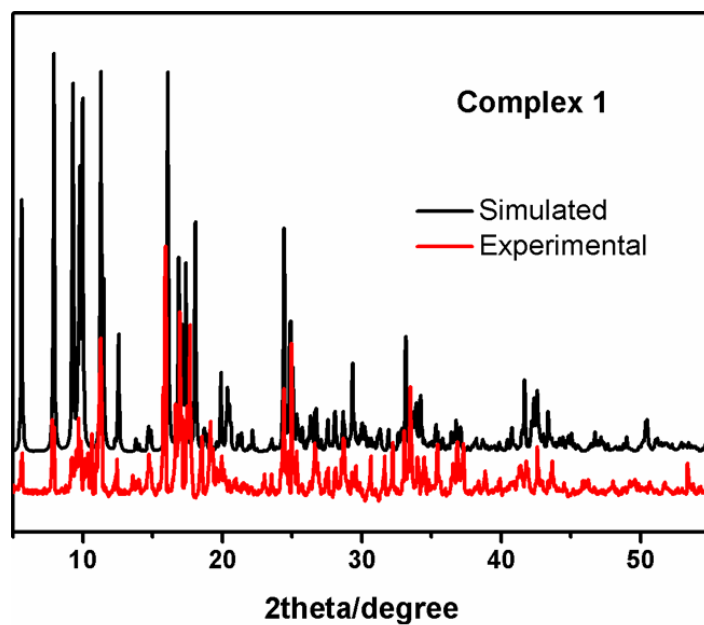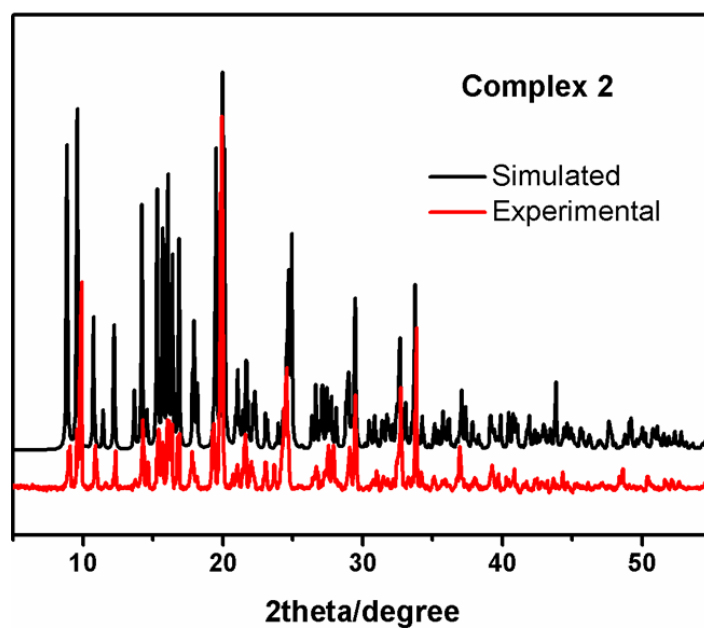

**Figure S2: The IR spectra of complexes 1 and 2**

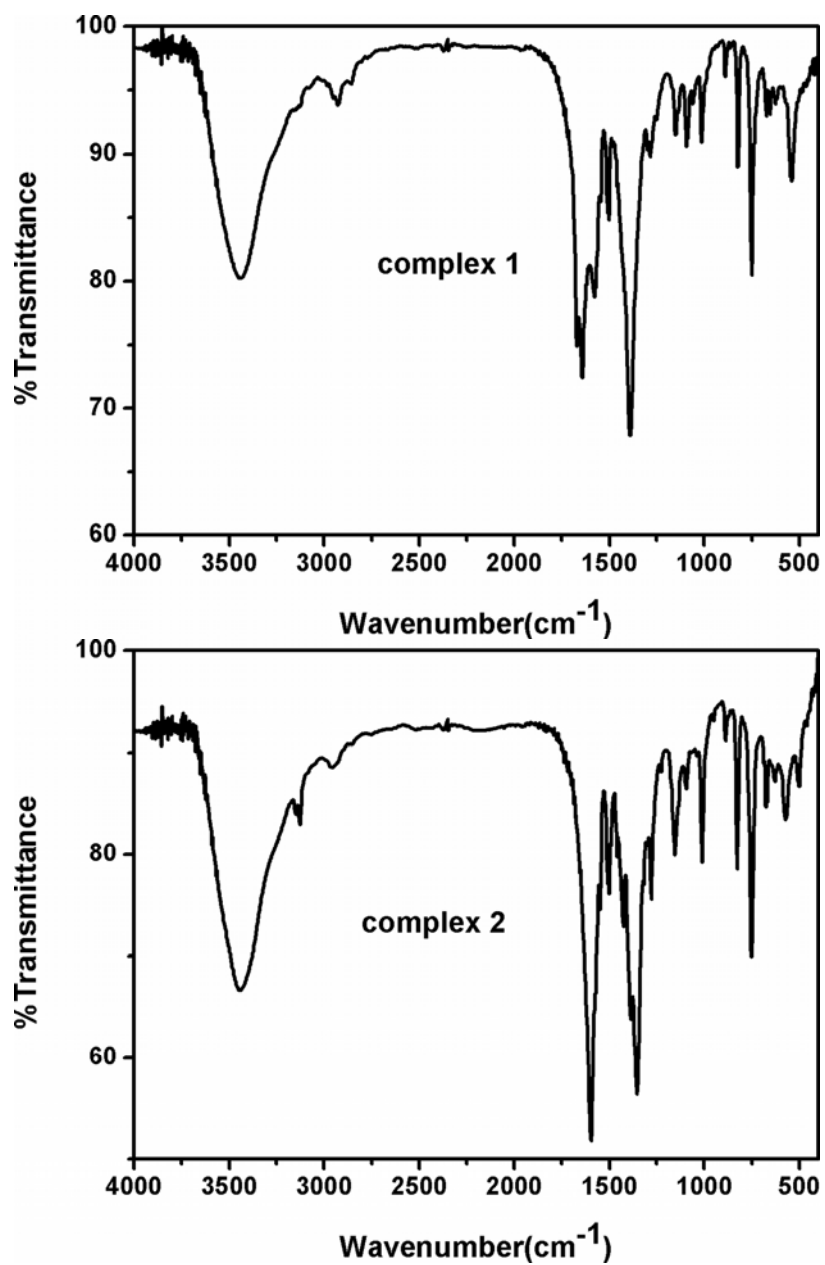

**Figure S3: The 2D layer structure of complex 1**

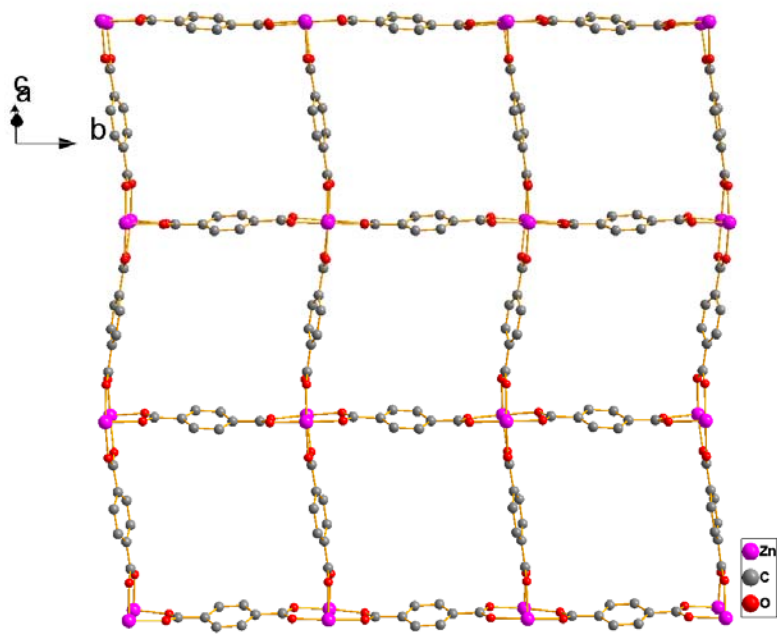

Supplement: c2ce25673h.pdf [file c2ce25673h.pdf]
